# Supplementary material for: Comparison of the burden of self-reported bacterial sexually transmitted infections among men having sex with men across 68 countries on four continents
Source: PubMed Central journal article supplement (PMC10228115; doi:10.1186/s12889-023-15946-8), 2023-05-30
Supplement: 12889_2023_15946_MOESM3_ESM.pdf [file 12889_2023_15946_MOESM3_ESM.pdf]

**Additional Table S1: Number of respondents per country (in alphabetical order), distribution by self-reported diagnosis, and by assigned symptom status, EMIS-2017 and LAMIS 2018 data.**

| Codes                     | no syphilis    | symptomatic  | asymptomatic | unclassifiable | unclassifiable2_3 | unknown      | Total          | no gonorrhoea  | symptomatic  | asymptomatic | unclassifiable | unclassifiable2_3 | unknown      | Total          | no chlamydia   | symptomatic  | asymptomatic | unclassifiable | unclassifiable2_3 | unknown      | Total          |
|---------------------------|----------------|--------------|--------------|----------------|-------------------|--------------|----------------|----------------|--------------|--------------|----------------|-------------------|--------------|----------------|----------------|--------------|--------------|----------------|-------------------|--------------|----------------|
| Albania/Kosovo/Montenegro | 160            | 2            | 0            | 1              | 0                 | 1            | 163            | 152            | 1            | 1            | 5              | 0                 | 5            | 159            | 153            | 2            | 0            | 1              | 0                 | 1            | 156            |
| Argentina                 | 5,040          | 124          | 65           | 177            | 7                 | 184          | 5,413          | 5,199          | 61           | 11           | 101            | 6                 | 107          | 5,378          | 5,257          | 21           | 3            | 58             | 1                 | 59           | 5,340          |
| Austria                   | 2,588          | 19           | 16           | 43             | 3                 | 46           | 2,669          | 2,554          | 33           | 15           | 57             | 1                 | 58           | 2,660          | 2,533          | 21           | 17           | 51             | 2                 | 53           | 2,624          |
| Belarus                   | 423            | 0            | 2            | 6              | 0                 | 6            | 431            | 416            | 7            | 3            | 5              | 0                 | 5            | 431            | 416            | 4            | 3            | 3              | 0                 | 3            | 426            |
| Belgium*                  | 1,780          | 26           | 16           | 77             | 6                 | 83           | 1,905          | 1,773          | 32           | 15           | 73             | 5                 | 78           | 1,898          | 1,755          | 19           | 15           | 85             | 2                 | 87           | 1,876          |
| Bolivia                   | 671            | 10           | 6            | 28             | 2                 | 30           | 717            | 676            | 15           | 5            | 21             | 1                 | 22           | 718            | 702            | 1            | 0            | 9              | 1                 | 10           | 713            |
| Bosnia & Herzegovina      | 227            | 0            | 0            | 0              | 0                 | 0            | 227            | 223            | 0            | 0            | 1              | 0                 | 1            | 224            | 221            | 2            | 1            | 0              | 0                 | 0            | 224            |
| Brazil                    | 15,964         | 549          | 373          | 951            | 44                | 995          | 17,881         | 17,092         | 145          | 93           | 500            | 35                | 535          | 17,865         | 17,398         | 59           | 57           | 175            | 12                | 187          | 17,701         |
| Bulgaria                  | 1,113          | 11           | 4            | 23             | 3                 | 26           | 1,154          | 1,117          | 9            | 1            | 19             | 1                 | 20           | 1,147          | 1,102          | 5            | 3            | 22             | 2                 | 24           | 1,134          |
| Canada                    | 5,771          | 32           | 35           | 127            | 13                | 140          | 5,978          | 5,536          | 95           | 91           | 239            | 8                 | 247          | 5,969          | 5,533          | 75           | 71           | 239            | 9                 | 248          | 5,927          |
| Chile                     | 4,554          | 101          | 61           | 156            | 16                | 172          | 4,888          | 4,686          | 60           | 11           | 100            | 12                | 112          | 4,869          | 4,746          | 22           | 8            | 44             | 8                 | 52           | 4,828          |
| Colombia                  | 7,364          | 224          | 140          | 305            | 28                | 333          | 8,061          | 7,659          | 109          | 31           | 217            | 26                | 243          | 8,042          | 7,883          | 31           | 8            | 54             | 2                 | 56           | 7,978          |
| Costa Rica                | 930            | 28           | 7            | 29             | 4                 | 33           | 998            | 943            | 17           | 7            | 28             | 3                 | 31           | 998            | 973            | 7            | 4            | 6              | 2                 | 8            | 992            |
| Croatia                   | 998            | 1            | 1            | 7              | 2                 | 9            | 1,009          | 978            | 8            | 1            | 9              | 2                 | 11           | 998            | 971            | 5            | 4            | 12             | 2                 | 14           | 994            |
| Cyprus                    | 291            | 3            | 4            | 3              | 0                 | 3            | 301            | 289            | 5            | 0            | 6              | 0                 | 6            | 300            | 284            | 3            | 1            | 5              | 0                 | 5            | 293            |
| Czech Republic            | 1,837          | 16           | 12           | 20             | 2                 | 22           | 1,887          | 1,798          | 23           | 16           | 30             | 1                 | 31           | 1,868          | 1,827          | 5            | 7            | 16             | 2                 | 18           | 1,857          |
| Denmark                   | 1,630          | 16           | 10           | 24             | 2                 | 26           | 1,682          | 1,559          | 42           | 13           | 59             | 2                 | 61           | 1,675          | 1,563          | 30           | 18           | 58             | 1                 | 59           | 1,670          |
| Ecuador                   | 1,339          | 19           | 20           | 35             | 1                 | 36           | 1,414          | 1,354          | 15           | 7            | 31             | 1                 | 32           | 1,408          | 1,369          | 9            | 1            | 13             | 0                 | 13           | 1,392          |
| El Salvador               | 525            | 8            | 11           | 18             | 1                 | 19           | 563            | 549            | 1            | 2            | 8              | 1                 | 9            | 561            | 546            | 0            | 2            | 6              | 0                 | 6            | 554            |
| Estonia                   | 204            | 1            | 0            | 3              | 0                 | 3            | 208            | 206            | 0            | 0            | 3              | 0                 | 3            | 209            | 199            | 2            | 0            | 6              | 0                 | 6            | 207            |
| Finland                   | 1,372          | 5            | 3            | 10             | 0                 | 10           | 1,390          | 1,337          | 12           | 8            | 25             | 0                 | 25           | 1,382          | 1,338          | 5            | 13           | 24             | 0                 | 24           | 1,380          |
| France*                   | 678            | 9            | 10           | 22             | 2                 | 24           | 721            | 675            | 11           | 5            | 24             | 1                 | 25           | 716            | 667            | 3            | 10           | 28             | 2                 | 30           | 710            |
| Germany                   | 22,015         | 179          | 118          | 414            | 42                | 456          | 22,768         | 21,685         | 307          | 123          | 520            | 29                | 549          | 22,664         | 21,560         | 211          | 156          | 471            | 25                | 496          | 22,423         |
| Greece                    | 2,749          | 35           | 12           | 51             | 1                 | 52           | 2,848          | 2,754          | 19           | 8            | 39             | 0                 | 39           | 2,820          | 2,763          | 9            | 1            | 16             | 1                 | 17           | 2,790          |
| Guatemala                 | 1,057          | 15           | 19           | 29             | 3                 | 32           | 1,123          | 1,076          | 18           | 2            | 26             | 2                 | 28           | 1,124          | 1,094          | 4            | 3            | 9              | 1                 | 10           | 1,111          |
| Honduras                  | 613            | 4            | 5            | 14             | 0                 | 14           | 636            | 619            | 6            | 0            | 9              | 0                 | 9            | 634            | 629            | 2            | 1            | 2              | 0                 | 2            | 634            |
| Hungary                   | 2,095          | 16           | 9            | 27             | 6                 | 33           | 2,153          | 2,096          | 20           | 4            | 22             | 6                 | 28           | 2,148          | 2,099          | 8            | 2            | 13             | 2                 | 15           | 2,124          |
| Iceland                   | 107            | 0            | 0            | 2              | 1                 | 3            | 110            | 105            | 1            | 1            | 4              | 0                 | 4            | 111            | 102            | 1            | 2            | 5              | 1                 | 6            | 111            |
| Ireland                   | 1,985          | 8            | 10           | 46             | 2                 | 48           | 2,051          | 1,860          | 45           | 29           | 110            | 1                 | 111          | 2,045          | 1,926          | 18           | 23           | 70             | 1                 | 71           | 2,038          |
| Israel                    | 1,187          | 6            | 5            | 22             | 2                 | 24           | 1,222          | 1,137          | 25           | 10           | 42             | 2                 | 44           | 1,216          | 1,123          | 26           | 7            | 31             | 1                 | 32           | 1,188          |
| Italy                     | 10,467         | 126          | 63           | 210            | 6                 | 216          | 10,872         | 10,577         | 64           | 29           | 149            | 6                 | 155          | 10,825         | 10,567         | 32           | 24           | 108            | 2                 | 110          | 10,733         |
| Latvia                    | 240            | 1            | 1            | 5              | 0                 | 5            | 247            | 241            | 2            | 0            | 1              | 0                 | 1            | 244            | 229            | 3            | 0            | 2              | 0                 | 2            | 234            |
| Lebanon                   | 238            | 1            | 1            | 3              | 0                 | 3            | 243            | 230            | 1            | 4            | 7              | 0                 | 7            | 242            | 226            | 4            | 3            | 7              | 0                 | 7            | 240            |
| Lithuania                 | 362            | 0            | 2            | 2              | 0                 | 2            | 366            | 363            | 0            | 0            | 1              | 0                 | 1            | 364            | 351            | 2            | 2            | 2              | 0                 | 2            | 357            |
| Luxembourg                | 163            | 0            | 0            | 3              | 0                 | 3            | 166            | 158            | 0            | 1            | 3              | 0                 | 3            | 162            | 155            | 1            | 1            | 4              | 0                 | 4            | 161            |
| Malta                     | 278            | 2            | 3            | 4              | 0                 | 4            | 287            | 269            | 5            | 3            | 9              | 0                 | 9            | 286            | 278            | 4            | 1            | 7              | 0                 | 7            | 290            |
| Mexico                    | 13,971         | 202          | 167          | 323            | 13                | 336          | 14,676         | 14,165         | 115          | 34           | 340            | 7                 | 347          | 14,661         | 14,291         | 54           | 21           | 159            | 8                 | 167          | 14,533         |
| Moldova                   | 456            | 8            | 6            | 15             | 0                 | 15           | 485            | 477            | 2            | 1            | 2              | 0                 | 2            | 482            | 476            | 0            | 1            | 0              | 0                 | 0            | 477            |
| Netherlands               | 3,555          | 41           | 29           | 120            | 10                | 130          | 3,755          | 3,396          | 102          | 52           | 217            | 7                 | 224          | 3,774          | 3,299          | 76           | 77           | 283            | 6                 | 289          | 3,741          |
| Nicaragua                 | 511            | 4            | 2            | 6              | 1                 | 7            | 524            | 510            | 3            | 0            | 8              | 1                 | 9            | 522            | 517            | 1            | 1            | 3              | 0                 | 3            | 522            |
| North Macedonia           | 171            | 1            | 0            | 0              | 0                 | 0            | 172            | 170            | 0            | 0            | 1              | 0                 | 1            | 171            | 167            | 0            | 0            | 1              | 0                 | 1            | 168            |
| Norway                    | 2,881          | 11           | 3            | 25             | 5                 | 30           | 2,925          | 2,788          | 33           | 18           | 74             | 4                 | 78           | 2,917          | 2,779          | 38           | 16           | 76             | 3                 | 79           | 2,912          |
| Panama                    | 688            | 13           | 15           | 25             | 2                 | 27           | 743            | 716            | 8            | 6            | 15             | 2                 | 17           | 747            | 734            | 4            | 1            | 4              | 0                 | 4            | 743            |
| Paraguay                  | 504            | 26           | 20           | 25             | 3                 | 28           | 578            | 552            | 2            | 2            | 11             | 3                 | 14           | 570            | 558            | 1            | 0            | 8              | 0                 | 8            | 567            |
| Peru                      | 1,836          | 37           | 25           | 59             | 3                 | 62           | 1,960          | 1,852          | 26           | 8            | 60             | 3                 | 63           | 1,949          | 1,877          | 9            | 5            | 30             | 1                 | 31           | 1,922          |
| Philippines               | 3,283          | 12           | 12           | 26             | 2                 | 28           | 3,335          | 3,224          | 49           | 7            | 58             | 2                 | 60           | 3,340          | 3,276          | 7            | 5            | 12             | 0                 | 12           | 3,300          |
| Poland                    | 3,777          | 52           | 20           | 97             | 4                 | 101          | 3,950          | 3,825          | 35           | 8            | 57             | 3                 | 60           | 3,928          | 3,868          | 16           | 7            | 33             | 2                 | 35           | 3,926          |
| Portugal                  | 2,344          | 49           | 32           | 81             | 9                 | 90           | 2,515          | 2,346          | 33           | 23           | 86             | 7                 | 93           | 2,495          | 2,383          | 11           | 11           | 39             | 4                 | 43           | 2,448          |
| Romania                   | 1,920          | 11           | 7            | 34             | 0                 | 34           | 1,972          | 1,911          | 7            | 9            | 22             | 0                 | 22           | 1,949          | 1,906          | 6            | 3            | 15             | 0                 | 15           | 1,930          |
| Russia                    | 5,944          | 68           | 35           | 104            | 2                 | 106          | 6,153          | 5,979          | 56           | 14           | 56             | 1                 | 57           | 6,106          | 5,876          | 55           | 21           | 52             | 1                 | 53           | 6,005          |
| Serbia                    | 1,001          | 8            | 2            | 14             | 0                 | 14           | 1,025          | 1,012          | 3            | 1            | 6              | 0                 | 6            | 1,022          | 1,001          | 0            | 0            | 8              | 0                 | 8            | 1,009          |
| Slovakia                  | 982            | 2            | 2            | 7              | 1                 | 8            | 994            | 972            | 7            | 4            | 7              | 1                 | 8            | 991            | 978            | 0            | 1            | 5              | 0                 | 5            | 984            |
| Slovenia                  | 663            | 8            | 4            | 4              | 1                 | 5            | 680            | 656            | 2            | 4            | 10             | 1                 | 11           | 673            | 666            | 1            | 3            | 3              | 0                 | 3            | 673            |
| Spain                     | 9,970          | 142          | 83           | 321            | 23                | 344          | 10,539         | 9,846          | 215          | 90           | 315            | 16                | 331          | 10,482         | 9,975          | 101          | 62           | 212            | 11                | 223          | 10,361         |
| Suriname                  | 187            | 7            | 1            | 4              | 0                 | 4            | 199            | 201            | 1            | 0            | 2              | 0                 | 2            | 204            | 193            | 0            | 1            | 4              | 0                 | 4            | 198            |
| Sweden                    | 4,330          | 12           | 7            | 32             | 2                 | 34           | 4,383          | 4,208          | 35           | 31           | 81             | 1                 | 82           | 4,356          | 4,180          | 31           | 38           | 101            | 2                 | 103          | 4,352          |
| Switzerland*              | 2,596          | 21           | 21           | 49             | 6                 | 55           | 2,693          | 2,521          | 52           | 27           | 79             | 4                 | 83           | 2,683          | 2,501          | 32           | 24           | 72             | 4                 | 76           | 2,633          |
| Turkey                    | 1,721          | 13           | 7            | 30             | 1                 | 31           | 1,772          | 1,644          | 16           | 20           | 83             | 1                 | 84           | 1,764          | 1,720          | 3            | 1            | 5              | 1                 | 6            | 1,730          |
| Ukraine                   | 1,153          | 10           | 6            | 11             | 1                 | 12           | 1,181          | 1,157          | 12           | 2            | 7              | 1                 | 8            | 1,179          | 1,147          | 11           | 2            | 9              | 0                 | 9            | 1,169          |
| United Kingdom            | 11,392         | 56           | 63           | 216            | 24                | 240          | 11,751         | 10,792         | 204          | 171          | 540            | 21                | 561          | 11,728         | 10,850         | 161          | 174          | 486            | 10                | 496          | 11,681         |
| Uruguay                   | 744            | 5            | 5            | 8              | 0                 | 8            | 762            | 746            | 9            | 1            | 7              | 0                 | 7            | 763            | 748            | 4            | 0            | 1              | 0                 | 1            | 753            |
| Venezuela                 | 2,315          | 26           | 19           | 44             | 0                 | 44           | 2,404          | 2,358          | 11           | 4            | 16             | 0                 | 16           | 2,389          | 2,355          | 2            | 3            | 15             | 0                 | 15           | 2,375          |
| <b>Total</b>              | <b>177,910</b> | <b>2,442</b> | <b>1,637</b> | <b>4577</b>    | <b>312</b>        | <b>4,889</b> | <b>186,878</b> | <b>177,965</b> | <b>2,252</b> | <b>1,087</b> | <b>4,663</b>   | <b>238</b>        | <b>4,901</b> | <b>186,205</b> | <b>178,859</b> | <b>1,280</b> | <b>950</b>   | <b>3,298</b>   | <b>135</b>        | <b>3,433</b> | <b>184,522</b> |

\* corrected for French questionnaire artefact
