# Supplementary material for: Comparison of the burden of self-reported bacterial sexually transmitted infections among men having sex with men across 68 countries on four continents
Source: PubMed Central journal article supplement (PMC10228115; doi:10.1186/s12889-023-15946-8), 2023-05-30
Supplement: 12889_2023_15946_MOESM4_ESM.pdf [file 12889_2023_15946_MOESM4_ESM.pdf]

**Additional Table S2:** Comparison of Syphilis multilevel multivariable regression model with Syphilis multivariable model, impact of partner notification.

|                                                           | Syphilis, univariate<br>N=158,604           |                    |           |           | Syphilis multilevel multivariable, all diagnoses<br>N=184,977 |           |           |        | Syphilis multivariable, all diagnoses<br>N=184,977 |           |        |  |
|-----------------------------------------------------------|---------------------------------------------|--------------------|-----------|-----------|---------------------------------------------------------------|-----------|-----------|--------|----------------------------------------------------|-----------|--------|--|
|                                                           | OR                                          | 95% CI             | p         | aOR       | 95% CI                                                        | p         | aOR       | 95% CI | p                                                  |           |        |  |
|                                                           | ref.                                        |                    |           |           |                                                               |           |           |        |                                                    |           |        |  |
| Region                                                    | Central/West Europe                         | ref.               |           |           |                                                               |           |           |        |                                                    |           |        |  |
|                                                           | West Europe                                 | 1.78               | 1.05 2.93 | 0.033     | 0.81                                                          | 0.45 1.46 | 0.483     | 0.86   | 0.65 1.15                                          | 0.312     |        |  |
|                                                           | Northwest Europe                            | 1.46               | 0.84 2.54 | 0.177     | 1.32                                                          | 0.80 1.94 | 0.449     | 1.24   | 1.09 1.42                                          | 0.001     |        |  |
|                                                           | Northwest Europe                            | 0.81               | 0.29 0.88 | 0.016     | 0.79                                                          | 0.39 0.80 | 0.011     | 0.83   | 0.51 0.78                                          | <0.001    |        |  |
|                                                           | Northwest Europe                            | 0.54               | 0.25 1.16 | 0.113     | 0.77                                                          | 0.40 1.49 | 0.438     | 0.98   | 0.53 0.96                                          | 0.034     |        |  |
|                                                           | Central/East Europe                         | 0.78               | 0.48 1.34 | 0.011     | 1.15                                                          | 0.78 1.60 | 0.471     | 1.48   | 1.26 1.78                                          | <0.001    |        |  |
|                                                           | Southeast Europe                            | 0.69               | 0.42 1.12 | 0.132     | 0.87                                                          | 0.63 1.27 | 0.626     | 1.02   | 0.79 1.07                                          | 0.281     |        |  |
|                                                           | East Europe                                 | 0.97               | 0.55 1.71 | 0.908     | 0.94                                                          | 0.60 1.48 | 0.781     | 0.89   | 0.66 0.86                                          | 0.001     |        |  |
|                                                           | Middle East                                 | 0.76               | 0.38 1.62 | 0.478     | 0.73                                                          | 0.41 1.32 | 0.209     | 0.98   | 0.40 0.83                                          | 0.001     |        |  |
|                                                           | Mediterranean                               | 0.46               | 0.20 1.10 | 0.086     | 0.60                                                          | 0.31 1.17 | 0.152     | 0.78   | 0.28 0.51                                          | <0.001    |        |  |
|                                                           | Canada                                      | 1.05               | 0.46 2.42 | 0.902     | 0.59                                                          | 0.27 1.20 | 0.187     | 0.76   | 0.54 1.05                                          | 0.006     |        |  |
|                                                           | Mexico                                      | 1.48               | 0.65 3.38 | 0.346     | 1.54                                                          | 0.84 2.82 | 0.161     | 0.92   | 0.77 1.11                                          | 0.407     |        |  |
|                                                           | Central America (CH, GT, HN, NI, PA, SV)    | 1.84               | 0.98 2.74 | 0.057     | 2.02                                                          | 1.32 3.09 | 0.001     | 1.48   | 1.19 1.81                                          | <0.001    |        |  |
|                                                           | Andean region (BO, EC, CO, PE and VE & SR)  | 1.84               | 1.11 3.05 | 0.019     | 1.89                                                          | 1.28 3.10 | 0.002     | 1.64   | 1.29 1.78                                          | <0.001    |        |  |
|                                                           | South/Central (AR, CL, LV, and PY)          | 2.94               | 1.18 3.53 | 0.011     | 1.92                                                          | 1.22 3.01 | 0.004     | 1.39   | 1.15 1.68                                          | 0.001     |        |  |
|                                                           | Brazil                                      | 3.83               | 1.58 8.02 | 0.003     | 1.85                                                          | 0.84 4.08 | 0.126     | 1.40   | 1.15 2.22                                          | 0.006     |        |  |
|                                                           | Survey artefacts                            | French translation | ref.      |           |                                                               |           |           |        |                                                    |           |        |  |
|                                                           |                                             | Yes                | 1.92      | 1.66 2.23 | <0.001                                                        | 2.03      | 1.73 2.37 | <0.001 | 2.33                                               | 2.03 2.68 | <0.001 |  |
|                                                           | Discrepant data                             | No                 | ref.      |           |                                                               |           |           |        |                                                    |           |        |  |
|                                                           |                                             | Yes                | 1.35      | 1.28 1.43 | <0.001                                                        | 1.30      | 1.22 1.38 | <0.001 | 1.30                                               | 1.22 1.38 | <0.001 |  |
|                                                           | Sample composition                          | <25 y              | ref.      |           |                                                               |           |           |        |                                                    |           |        |  |
|                                                           |                                             | 25-29              | 1.69      | 1.58 1.80 | <0.001                                                        | 1.33      | 1.24 1.43 | <0.001 | 1.32                                               | 1.23 1.42 | <0.001 |  |
|                                                           | Age group                                   | 30-39              | 1.85      | 1.84 2.08 | <0.001                                                        | 1.30      | 1.21 1.39 | <0.001 | 1.29                                               | 1.20 1.39 | <0.001 |  |
| 40-49                                                     |                                             | 1.99               | 1.88 2.13 | <0.001    | 1.13                                                          | 1.08 1.24 | <0.001    | 1.14   | 1.08 1.23                                          | 0.001     |        |  |
| 50+                                                       |                                             | 1.84               | 1.52 1.77 | <0.001    | 0.97                                                          | 0.89 1.06 | 0.494     | 0.96   | 0.88 1.05                                          | 0.469     |        |  |
| Settlement size (inhabitants)                             | Village/Countryside (<10,000)               | ref.               |           |           |                                                               |           |           |        |                                                    |           |        |  |
|                                                           | Small town (10,000-49,999)                  | 1.04               | 0.94 1.14 | 0.435     | 1.04                                                          | 0.94 1.15 | 0.507     | 1.02   | 0.92 1.13                                          | 0.663     |        |  |
|                                                           | Medium town (50,000-499,999)                | 1.17               | 1.07 1.28 | 0.001     | 1.07                                                          | 0.97 1.18 | 0.173     | 1.03   | 0.96 1.16                                          | 0.288     |        |  |
|                                                           | Big city (500,000-999,999)                  | 1.48               | 1.27 1.74 | <0.001    | 1.17                                                          | 1.08 1.29 | 0.002     | 1.17   | 1.08 1.29                                          | 0.001     |        |  |
|                                                           | Very big city (>1 million)                  | 1.99               | 1.48 1.74 | <0.001    | 1.18                                                          | 1.05 1.27 | 0.002     | 1.13   | 1.03 1.24                                          | 0.011     |        |  |
| Diagnosed HIV                                             | No                                          | ref.               |           |           |                                                               |           |           |        |                                                    |           |        |  |
|                                                           | Yes                                         | 6.27               | 5.05 5.60 | <0.001    | 3.84                                                          | 3.65 4.03 | <0.001    | 3.69   | 3.50 3.88                                          | <0.001    |        |  |
| Financial coping                                          | unaffordable                                | ref.               |           |           |                                                               |           |           |        |                                                    |           |        |  |
|                                                           | neither struggling nor comfortable          | 1.03               | 0.98 1.07 | 0.252     | 1.07                                                          | 1.02 1.12 | 0.010     | 1.07   | 1.02 1.12                                          | 0.002     |        |  |
|                                                           | struggling                                  | 1.18               | 1.09 1.21 | <0.001    | 1.10                                                          | 1.04 1.17 | 0.001     | 1.10   | 1.04 1.17                                          | 0.001     |        |  |
| STI screen                                                | No screening                                | ref.               |           |           |                                                               |           |           |        |                                                    |           |        |  |
|                                                           | 6-12 months ago                             | 0.74               | 0.68 0.80 | <0.001    | 0.81                                                          | 0.56 0.67 | <0.001    | 0.80   | 0.55 0.68                                          | <0.001    |        |  |
|                                                           | 1-6 months ago                              | 1.84               | 1.46 1.62 | <0.001    | 0.96                                                          | 0.90 1.01 | 0.107     | 0.94   | 0.89 0.99                                          | 0.023     |        |  |
|                                                           | Within the last 4 weeks                     | 2.81               | 2.46 2.77 | <0.001    | 1.43                                                          | 1.34 1.52 | <0.001    | 1.40   | 1.31 1.49                                          | <0.001    |        |  |
| Sexual behaviour                                          | None or one                                 | ref.               |           |           |                                                               |           |           |        |                                                    |           |        |  |
|                                                           | 2-4                                         | 1.25               | 1.15 1.34 | <0.001    | 1.05                                                          | 0.94 1.18 | 0.365     | 1.05   | 0.94 1.18                                          | 0.390     |        |  |
|                                                           | 5-7                                         | 1.92               | 1.78 2.08 | <0.001    | 1.46                                                          | 1.29 1.65 | <0.001    | 1.46   | 1.29 1.65                                          | <0.001    |        |  |
|                                                           | 8-10                                        | 2.28               | 2.07 2.47 | <0.001    | 1.87                                                          | 1.37 1.70 | <0.001    | 1.58   | 1.38 1.80                                          | <0.001    |        |  |
|                                                           | 11-20                                       | 2.89               | 2.78 3.01 | <0.001    | 1.87                                                          | 1.68 2.11 | <0.001    | 1.86   | 1.65 2.10                                          | <0.001    |        |  |
|                                                           | >20                                         | 5.86               | 5.58 6.38 | <0.001    | 2.73                                                          | 2.42 3.08 | <0.001    | 2.78   | 2.39 3.05                                          | <0.001    |        |  |
| Anal intercourse, condom use with last non-steady partner | No anal intercourse with non-steady partner | ref.               |           |           |                                                               |           |           |        |                                                    |           |        |  |
|                                                           | never condom with rmp                       | 3.25               | 2.95 3.58 | <0.001    | 1.54                                                          | 1.34 1.77 | <0.001    | 1.54   | 1.34 1.77                                          | <0.001    |        |  |
|                                                           | sometimes condom with rmp                   | 6.82               | 6.35 6.93 | <0.001    | 1.94                                                          | 1.72 2.24 | <0.001    | 1.96   | 1.72 2.24                                          | <0.001    |        |  |
|                                                           | sometimes condom with rmp                   | 4.72               | 4.38 5.10 | <0.001    | 1.80                                                          | 1.58 2.04 | <0.001    | 1.80   | 1.58 2.04                                          | <0.001    |        |  |
|                                                           | mostly condom with rmp                      | 2.83               | 2.73 3.14 | <0.001    | 1.41                                                          | 1.25 1.60 | <0.001    | 1.42   | 1.28 1.60                                          | <0.001    |        |  |
|                                                           | always condom with rmp                      | 1.34               | 1.24 1.44 | <0.001    | 0.83                                                          | 0.74 0.94 | 0.003     | 0.84   | 0.74 0.94                                          | 0.004     |        |  |
| PIEP use                                                  | never/doesn't know                          | 1.18               | 1.08 1.31 | 0.002     | 0.98                                                          | 0.84 1.10 | 0.007     | 0.97   | 0.88 1.11                                          | 0.887     |        |  |
|                                                           | when needed                                 | 2.09               | 1.78 2.46 | <0.001    | 1.49                                                          | 1.25 1.77 | <0.001    | 1.43   | 1.20 1.70                                          | <0.001    |        |  |
|                                                           | former daily use                            | 2.88               | 2.10 3.42 | <0.001    | 2.18                                                          | 1.88 2.83 | <0.001    | 2.09   | 1.61 2.70                                          | <0.001    |        |  |
|                                                           | current daily use                           | 3.39               | 3.02 3.72 | <0.001    | 1.85                                                          | 1.65 2.07 | <0.001    | 1.78   | 1.57 1.97                                          | <0.001    |        |  |
| Multipartner sex                                          | No                                          | ref.               |           |           |                                                               |           |           |        |                                                    |           |        |  |
|                                                           | Yes                                         | 2.47               | 2.36 2.60 | <0.001    | 1.31                                                          | 1.23 1.38 | <0.001    | 1.31   | 1.24 1.38                                          | <0.001    |        |  |
| Country level rates                                       | 11.28%                                      | ref.               |           |           |                                                               |           |           |        |                                                    |           |        |  |
|                                                           | 26.37%                                      | 1.81               | 1.01 2.96 | 0.044     | 1.11                                                          | 0.86 1.43 | 0.422     | 1.11   | 0.99 1.25                                          | 0.081     |        |  |
|                                                           | 30.27%                                      | 1.78               | 1.24 2.46 | 0.001     | 1.18                                                          | 0.91 1.63 | 0.208     | 1.18   | 1.03 1.31                                          | 0.011     |        |  |
|                                                           | 41.74% -100%                                | 2.86               | 1.57 4.19 | <0.001    | 1.88                                                          | 1.00 3.46 | 0.050     | 1.88   | 1.16 2.15                                          | 0.006     |        |  |
|                                                           | 0.00%                                       | ref.               |           |           |                                                               |           |           |        |                                                    |           |        |  |
| Partner notification rates after syphilis diagnosis       | 53.84%                                      | 1.35               | 0.91 2.00 | 0.131     | 1.03                                                          | 0.81 1.31 | 0.814     | 0.83   | 0.74 0.92                                          | 0.001     |        |  |
|                                                           | 67.84%                                      | 1.00               | 0.68 1.49 | 0.984     | 1.17                                                          | 0.84 1.61 | 0.366     | 0.85   | 0.59 0.78                                          | <0.001    |        |  |
|                                                           | 78.76% -100%                                | 0.86               | 0.44 0.99 | 0.044     | 0.91                                                          | 0.62 1.32 | 0.610     | 0.48   | 0.40 0.58                                          | <0.001    |        |  |
|                                                           | constant                                    | ref.               |           |           | 0.01                                                          | 0.01 0.01 | <0.001    | 0.01   | 0.01 0.02                                          | <0.001    |        |  |
| Random part                                               | 68 countries?                               | ref.               |           |           |                                                               |           |           |        |                                                    |           |        |  |
|                                                           | Random intercept                            | 0.99               | 0.93 0.99 | <0.001    | 0.99                                                          | 0.93 0.99 | <0.001    | 0.99   | 0.93 0.99                                          | <0.001    |        |  |

1 This study includes 68 countries, with four European microstates included in neighbouring (Andorra, Lichtenstein) or surrounding (Monaco, San Marino) countries, and with Albania, Montenegro and Kosovo merged to form a region; this results in 62 country-like entities included in the random part of the model.
